# Supplementary material
Source: ML conference proceedings conference paper supplement (https://aclanthology.org/2020.alw-1.22)
Supplement: OptionalSupplementaryMaterial [file 2020.alw-1.22.OptionalSupplementaryMaterial.zip]

## A Appendix

Algorithm 1: Python code of heuristic weight function

---

```
steps_overlap = 20
steps_agreement = 11

def getHeuristicWeight(overlap , agreement):
    # create empty matrix
    matrix = numpy.zeros(shape=(steps_overlap , steps_agreement))

    length_row = len(matrix)
    length_column = len(matrix[0])

    # define boundary points
    matrix[length_row - 1][0] = 0
    matrix[length_row - 1][length_row - 1] = 1
    matrix[0][0] = 0.2
    matrix[0][length_column - 1] = 0.6

    # fill first and last row of matrix
    for i in range(1, length_column - 1):
        matrix[0][i] = matrix[0][0] + (matrix[0][length_column - 1]
                                         - matrix[0][0]) * i / (length_column - 1)
        matrix[length_row - 1][i] = matrix[length_row - 1][0] +
                                         (matrix[length_row - 1][length_column - 1]
                                          - matrix[length_row - 1][0]) * i / (length_column - 1)

    # fill rest of the matrix
    for r in range(1, length_row - 1):
        for c in range(0, length_column):
            matrix[r][c] = matrix[0][c] + (matrix[length_row - 1][c]
                                             - matrix[0][c]) * r / (length_row - 1)

    # read the weight for the given overlap and agreement rate
    pos_overlap = int(overlap) - 1
    pos_agreement = int(round(agreement * 10))
    return matrix[pos_overlap][pos_agreement]
```

---
